# Supplementary material for: Polyurea-encapsulated palladium(ii) acetate: a robust and recyclable catalyst for use in conventional and supercritical mediaElectronic supplementary information (ESI) available: representative experimental procedures. See http://www.rsc.org/suppdata/cc/b2/b200677b/
Source: Royal Society of Chemistry journal article supplement (doi:10.1039/b200677b), 2002-04-23
Supplement: b200677b.doc [file b200677b.doc]

# Supplementary data

**Polyurea-encapsulated palladium(II) acetate: a robust and recyclable catalyst for use in conventional and supercritical media**

Representative procedure 1; carbonylation reaction: The aryl iodide (1 mmol) and MC-[Pd] (0.03 mmol, 3 mol %) were added to a 50 cm3 vessel which was evacuated and refilled with carbon monoxide gas. *n*BuOH (5 cm3) and Et3N (2.9 mmol) were added, and the mixture was heated at 90 ˚C for 16-24 h. The reaction mixture was cooled and filtered, and the solid material washed sequentially with CH2Cl2 (3  10 cm3), EtOH (3  10 cm3) and acetone (3  10 cm3). The mixture was concentrated *in vacuo* and the residue filtered through a plug of silica gel (Et2O, 30 mm  10 mm) to afford *the aryl esters*.

Representative procedure 2; Heck reaction: A solution of aryl halide (1 mmol), *n*Bu4NOAc (3 mmol) and an acrylate derivative (1.5 mmol) in isopropanol (5 cm3) was stirred at 90 ˚C in the presence of MC-[Pd] (0.025 mmol, 2.5 mol %) for 8-16 h. The reaction mixture was cooled and filtered, and the solid material washed sequentially with acetone (3  10 cm3) water (2  10 cm3) and Et2O (2  10 cm3). The mixture was washed with water (15 cm3), dried (MgSO4), filtered and concentrated *in vacuo* to afford a residue which was purified by chromatography on silica gel to give *the ,-unsaturated ester derivative*.

Representative procedure 3; Heck reaction in scCO2: The aryl bromide (1 mmol), MC-[Pd] (0.004 mmol, 0.4 mol %) butyl acrylate (2.0 mmol) and *n*Bu4NOAc (2.5 mmol) were placed in a 10 cm3 stainless steel pressure cell which was equipped with inlet and outlet fittings, a thermocouple, a sapphire window, and a magnetic stirrer bar. The cell was connected to a CO2 compressor (NWA PM 101 compressor pump) and charged with CO2 (previously dried and deoxygenated by passing CO2 over activated OxisorbTM catalyst) to a pressure of approximately 900 psi (half-full of liquid carbon dioxide). The cell was heated to 100 ºC and the pressure was adjusted to *ca*. 3000 psi by the addition of CO2. The reagents were stirred at this temperature and pressure for 16 h, and the cell was allowed to cool to room temperature (*ca.* 25 °C). The contents of the cell were vented into EtOAc (50 cm3), and once atmospheric pressure had been reached, the cell was opened and washed with EtOAc (2 x 10 cm3). The organic fractions were filtered, and concentrated *in vacuo* to afford a residue which was purified by flash chromatography on silica gel to afford *the* *butyl cinnamate products.*

Representative procedure 4; Suzuki reaction in scCO2: The aryl bromide (1 mmol), MC-[Pd] (0.004 mmol, 0.4 mol %) tolylboronic acid (*ca* 1.5 mmol) and *n*Bu4NOAc (2.5 mmol) were treated as described in representative procedure 3, to give *the biaryl products.* .

Representative procedure 5; Stille reaction: A solution of aryl halide (1 mmol), *n*Bu4NOAc (3 mmol) and trimethylphenyltin (1.3 mmol) in toluene/isopropanol (5 cm3, 1:1, v/v) was stirred at 90 ˚C in the presence of MC-[Pd] (0.025 mmol, 2.5 mol %) for 4-24 h. The reaction mixture was cooled and filtered, and the solid material washed sequentially with EtOAc (3  10 cm3) and Et2O (2  10 cm3). The mixture was concentrated *in vacuo* and the residue purified by chromatography on silica gel to afford *the biaryl derivative*.

Representative procedure 6; Stille reaction in scCO2: The aryl bromide (1 mmol), MC-[Pd] (0.004 mmol, 0.4 mol %) and trimethylphenyltin (1.0 mmol) were treated as described in representative procedure 3, to afford to afford *the biaryl products*..
